# Supplementary material for: Telomerase governs immunomodulatory properties of mesenchymal stem cells by regulating FAS ligand expression
Source: PubMed Central journal article supplement (PMC3958307; doi:10.1002/emmm.201303000), 2014-01-13
Supplement: emmm0006-0322-sd2.pdf [file emmm0006-0322-sd2.pdf]

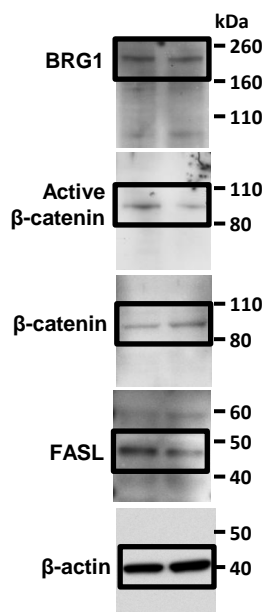

Fig. 3A

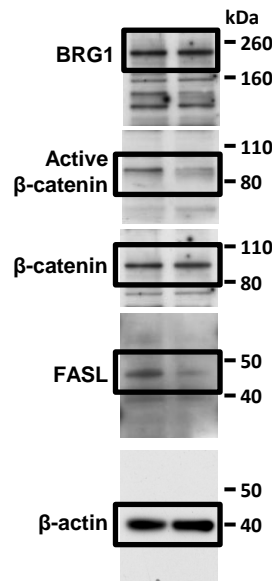

Fig. 3B

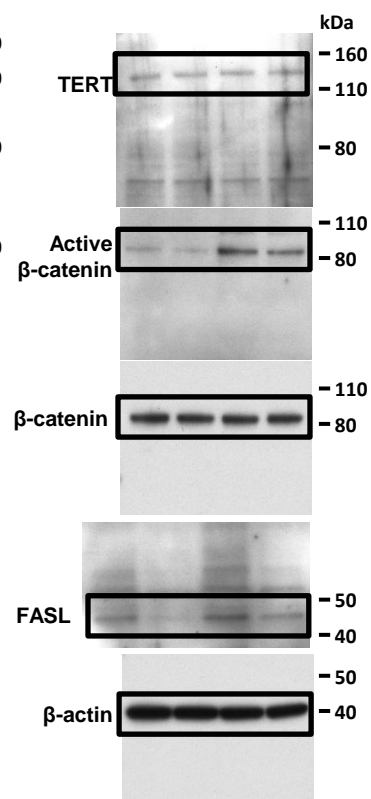

Fig. 3C

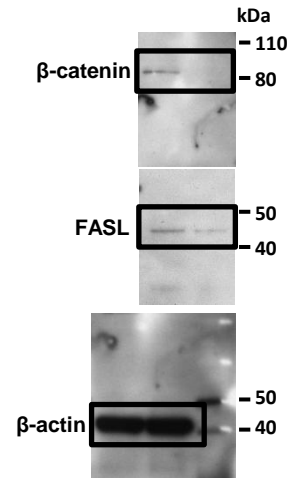

Fig. 3F

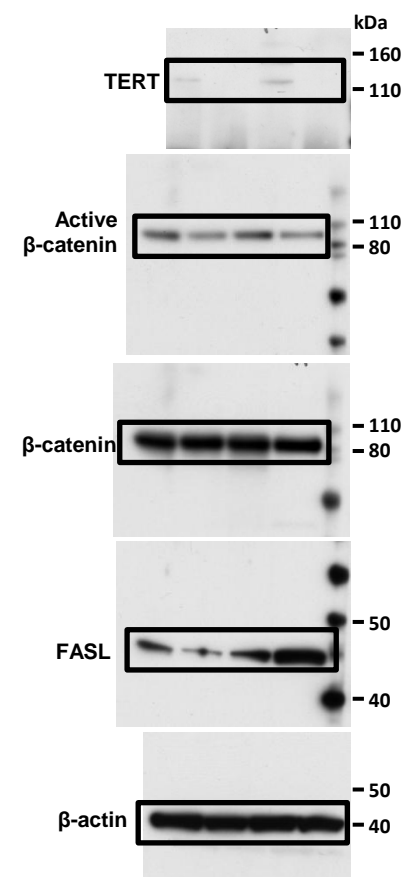

Fig. 3H

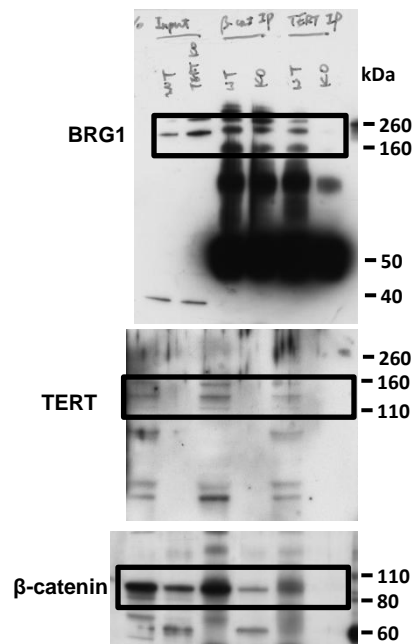

Fig. 3L
