# Supplementary material for: Telomerase governs immunomodulatory properties of mesenchymal stem cells by regulating FAS ligand expression
Source: PubMed Central journal article supplement (PMC3958307; doi:10.1002/emmm.201303000), 2014-01-13
Supplement: emmm0006-0322-sd5.pdf [file emmm0006-0322-sd5.pdf]

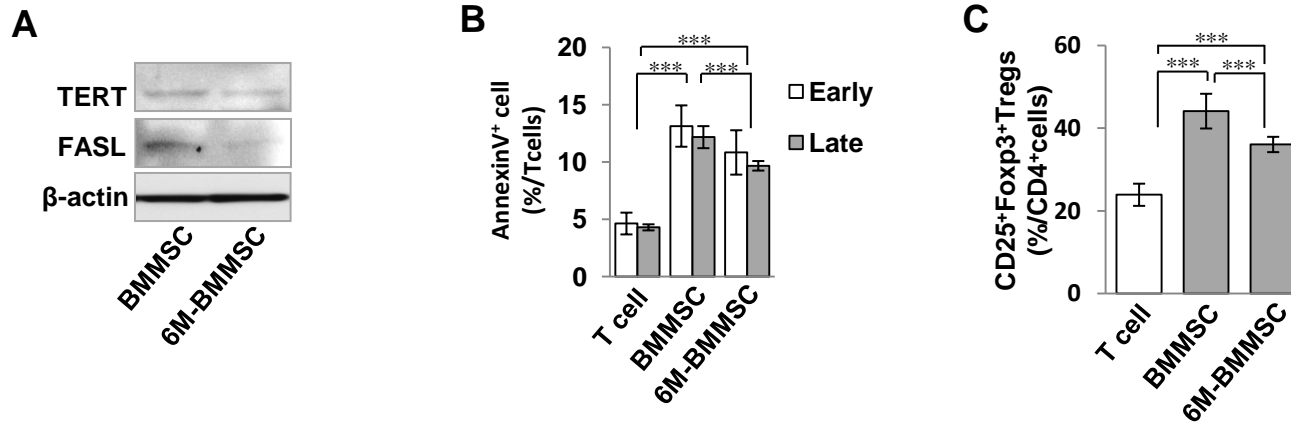

**Figure S2 BMMSCs from 6-month-old mice (6M-BMMSCs) have reduced immunomodulatory property.** (A) TERT and FASL expression levels were significantly decreased in 6M-BMMSCs compared to regular BMMSCs by Western blot analysis. (B) BMMSC-induced AnnexinV<sup>+</sup>7AAD<sup>-</sup> and AnnexinV<sup>+</sup>7AAD<sup>+</sup> double positive apoptotic T cells in an *in vitro* co-culture system was dramatically decreased in 6M-BMMSCs. (C) *In vitro* Treg induction by 6M-BMMSCs was markedly decreased. Error bars present the s.d. from three independent experiments (\*\*\*p<0.005).
