# Supplementary material for: Telomerase governs immunomodulatory properties of mesenchymal stem cells by regulating FAS ligand expression
Source: PubMed Central journal article supplement (PMC3958307; doi:10.1002/emmm.201303000), 2014-01-13
Supplement: emmm0006-0322-sd6.pdf [file emmm0006-0322-sd6.pdf]

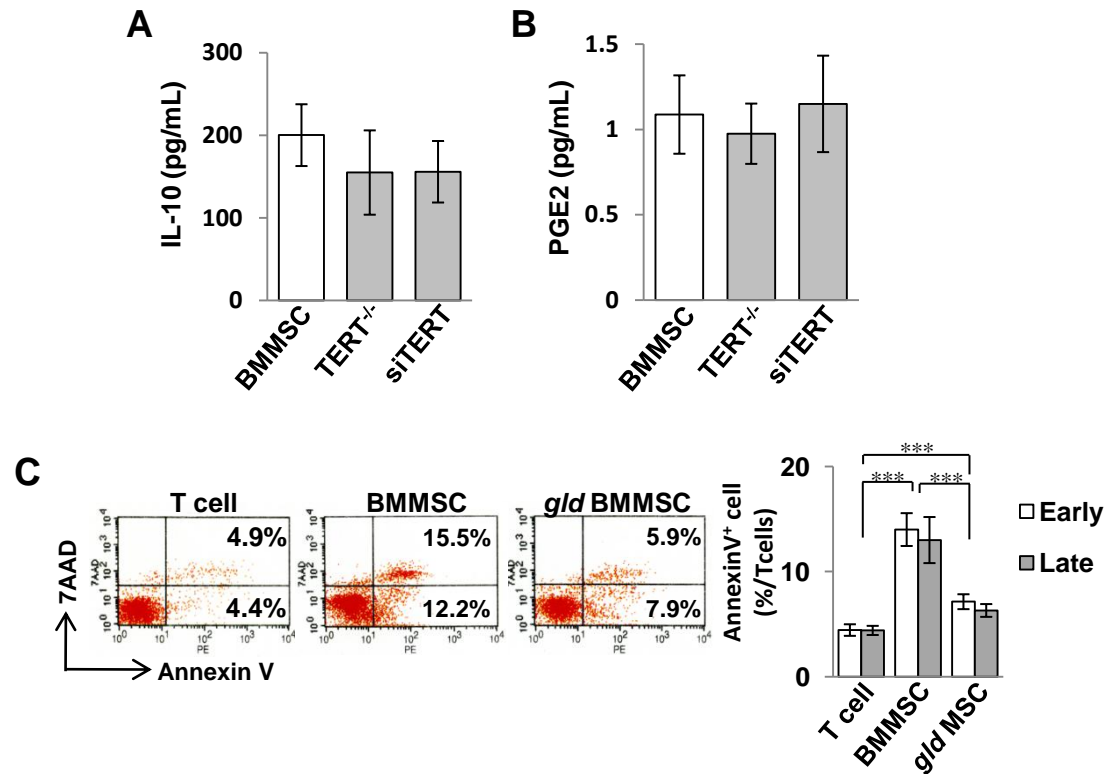

**Figure S3 FASL but not immunomodulatory factors mediates immunomodulation of BMMSCs.** Knockout of *TERT* or knockdown of *TERT* expression by siRNA in BMMSCs failed to affect expression levels of Interleukin-10 (IL-10) (A) and prostaglandin E2 (PGE2) (B). (C) *In vitro* coculture assay showed that FASL null BMMSCs (*gld*BMMSC) had decreased capacity to induce AnnexinV<sup>+</sup>7AAD<sup>-</sup> and AnnexinV<sup>+</sup>7AAD<sup>+</sup> double positive apoptotic T cells, confirming that FASL is essential for BMMSC-mediated immunomodulation. Error bars present the s.d. from six independent experiments (\*\*\*p<0.005).
