# Supplementary material for: Telomerase governs immunomodulatory properties of mesenchymal stem cells by regulating FAS ligand expression
Source: PubMed Central journal article supplement (PMC3958307; doi:10.1002/emmm.201303000), 2014-01-13
Supplement: emmm0006-0322-sd7.pdf [file emmm0006-0322-sd7.pdf]

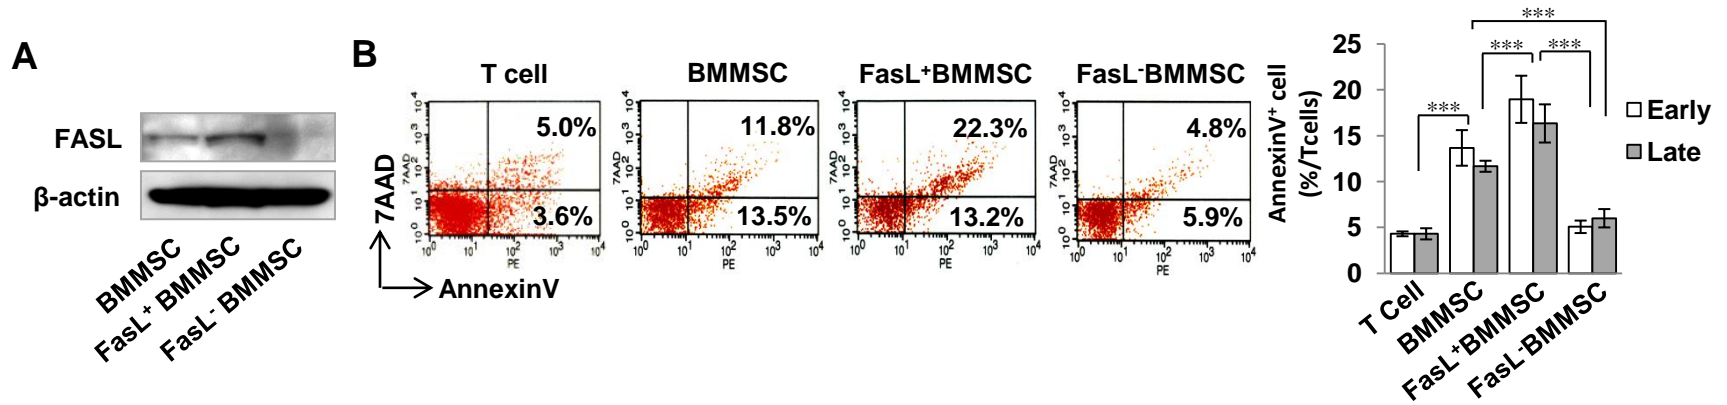

**Figure S4 FASL is required for BMMSCs to induce T cell apoptosis *in vitro*.** (A) Western blot analysis showed that FASL expression level before and after flow cytometric sorting by CD178 (FASL)-PE antibody in BMMSCs. (B) FASL<sup>+</sup> BMMSCs showed increased capacity to induce AnnexinV<sup>+</sup>7AAD<sup>-</sup> and AnnexinV<sup>+</sup>7AAD<sup>+</sup> double positive apoptotic T cells, while FASL<sup>-</sup> BMMSCs showed decreased capacity to induce AnnexinV<sup>+</sup>7AAD<sup>-</sup> and AnnexinV<sup>+</sup>7AAD<sup>+</sup> double positive apoptotic T cells when compared to non-sorted BMMSCs in an *in vitro* co-culture system. Error bars present the s.d. from six independent experiments (\*\*\*) $p < 0.005$ ).
