# Supplementary material for: Telomerase governs immunomodulatory properties of mesenchymal stem cells by regulating FAS ligand expression
Source: PubMed Central journal article supplement (PMC3958307; doi:10.1002/emmm.201303000), 2014-01-13
Supplement: emmm0006-0322-sd8.pdf [file emmm0006-0322-sd8.pdf]

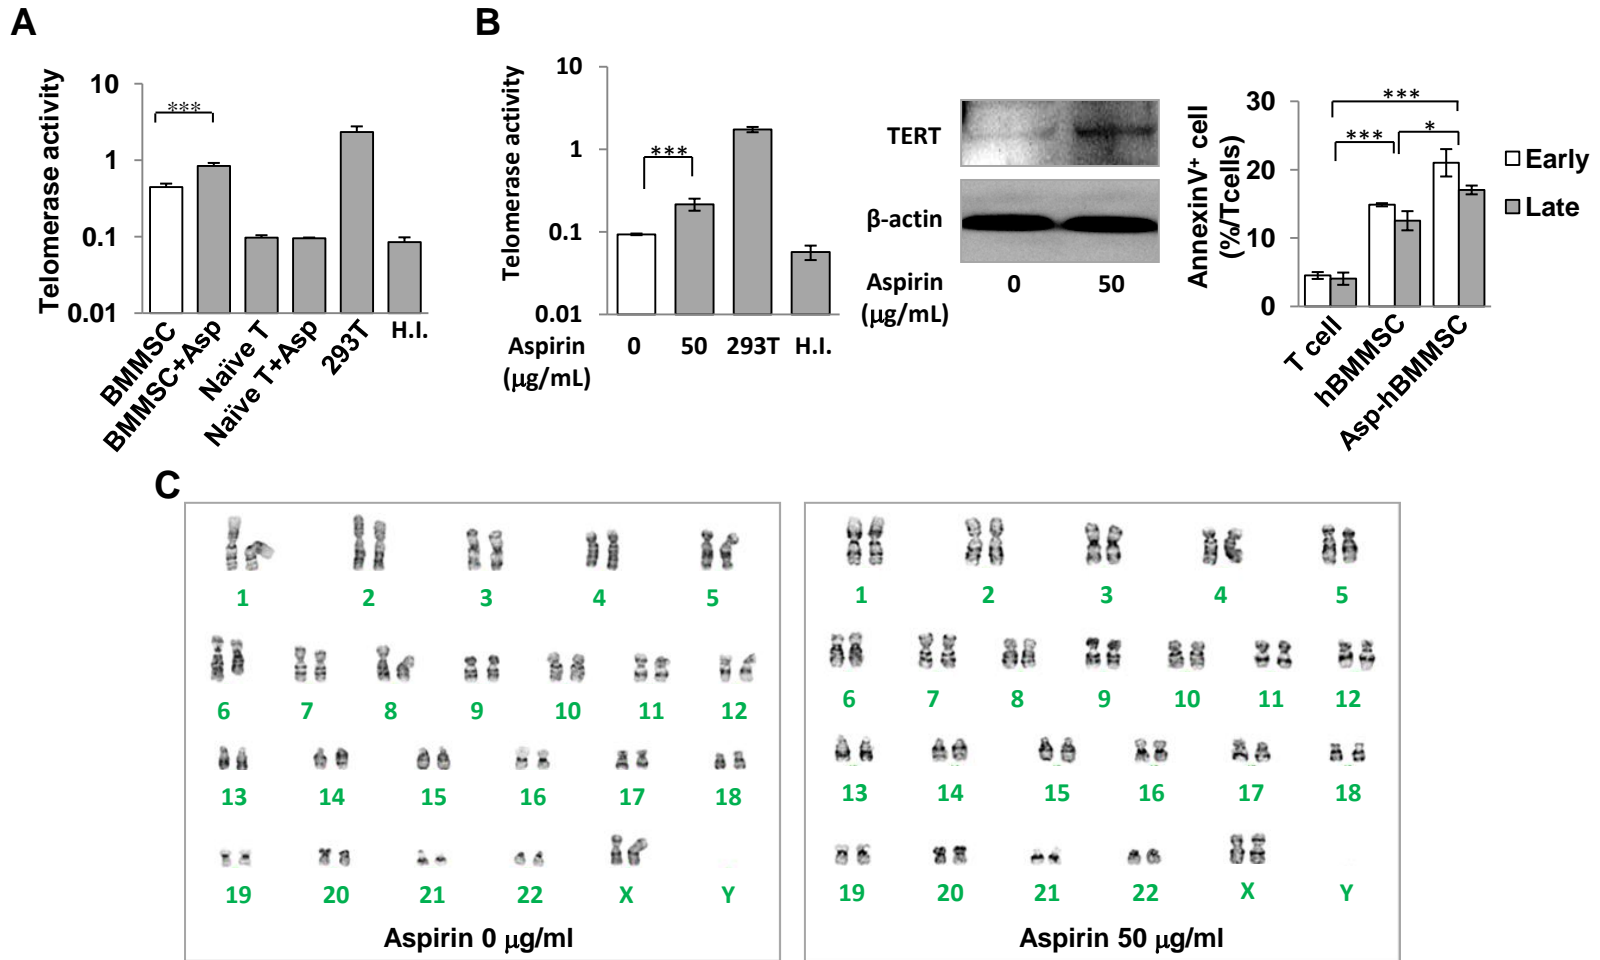

**Figure S5 Aspirin pretreatment increased immunomodulation of BMMSCs through TERT activation.** (A) Aspirin treatment showed specific increased telomerase activity in BMMSC, but not naïve T cells. (B) Aspirin-treated human BMMSCs showed increased telomerase activity, assessed by TRAP-ELISA telomere length assay. Western blot analysis showed no increased TERT expression in Aspirin-treated human BMMSCs. In an *in vitro* coculture system, aspirin-treated human BMMSCs showed increased capacity in inducing AnnexinV<sup>+</sup>7AAD<sup>-</sup> and AnnexinV<sup>+</sup>7AAD<sup>+</sup> double positive apoptotic T cells. (C) there is no karyotype alteration after aspirin treatment compared to untreated group. Error bars present the s.d. from three independent experiments (\*\*\*) $p < 0.005$ , \*) $p < 0.05$ ).
