# Supplementary material for: Telomerase governs immunomodulatory properties of mesenchymal stem cells by regulating FAS ligand expression
Source: PubMed Central journal article supplement (PMC3958307; doi:10.1002/emmm.201303000), 2014-01-13
Supplement: emmm0006-0322-sd9.pdf [file emmm0006-0322-sd9.pdf]

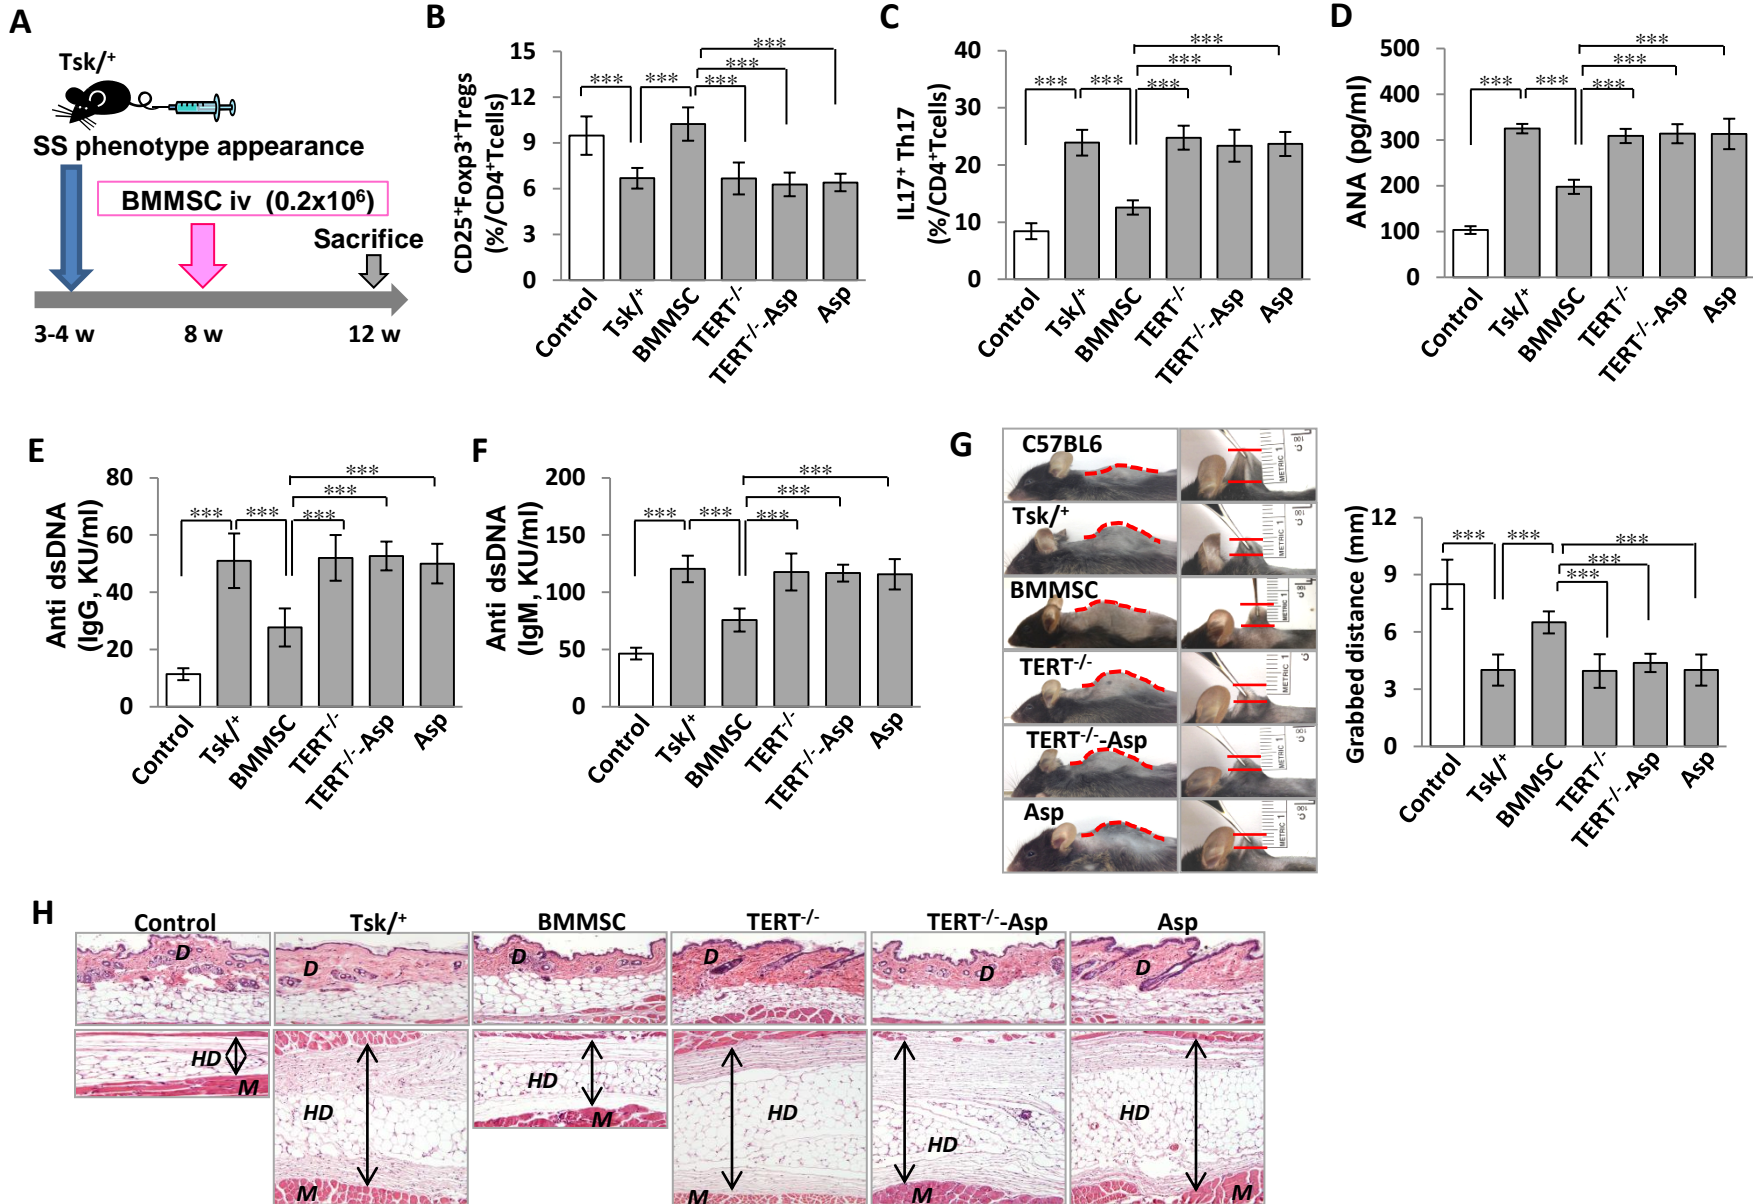

**Figure S6 Aspirin treatment failed to ameliorate systemic sclerosis phenotypes.** (A) Schema showed procedure of using *TERT*<sup>-/-</sup> BMMSCs, aspirin-pretreated *TERT*<sup>-/-</sup> BMMSCs (*TERT*<sup>-/-</sup>-Asp), or aspirin alone (Asp) to treat systemic sclerosis (SS) tight skin (Tsk<sup>+/+</sup>) mice. (B) Flow cytometric analysis showed that Treg level was significantly decreased in Tsk<sup>+/+</sup> mice compared to control littermates. After MSCT, Treg level was significantly elevated, whereas *TERT*<sup>-/-</sup> MSCT failed to upregulate Treg level in Tsk<sup>+/+</sup> mice. *TERT*<sup>-/-</sup>-Asp, along with Asp group, also failed to upregulate Treg levels in Tsk<sup>+/+</sup> mice. (C) Flow cytometric analysis showed that CD4<sup>+</sup>IL17<sup>+</sup> Th17 cells were significantly increased in Tsk<sup>+/+</sup> mice compared to control littermates. MSCT, but not *TERT*<sup>-/-</sup> MSCT, was able to significantly reduce Th17 level in Tsk<sup>+/+</sup> mice. *TERT*<sup>-/-</sup>-Asp, along with Asp group, also failed to reduce Th17 levels in Tsk<sup>+/+</sup> mice. (D-F) ELISA assays showed that Tsk<sup>+/+</sup> mice had elevated levels of anti-double strand DNA antibodies IgG (D), IgM (E) and antinuclear antibody (ANA, F) when compared to control littermates. MSCT reduced the levels of anti-double strand DNA antibodies IgG (D), IgM (E) and ANA (F). In contrast, *TERT*<sup>-/-</sup> MSCT failed to reduce the levels of anti-double strand DNA antibodies IgG (D), IgM (E) and ANA (F). *TERT*<sup>-/-</sup>-Asp, along with Asp group, also failed to reduce the levels of anti-double strand DNA antibodies IgG (D), IgM (E) and ANA (F). (G) Tsk<sup>+/+</sup> mice showed tight skin phenotype. Grabbed skin distance measurement showed that BMMSC, but not *TERT*<sup>-/-</sup> MSCT, significantly improved tight skin phenotype. *TERT*<sup>-/-</sup>-Asp, along with Asp group, also failed to improve tight skin phenotype. (H) Histological examination identified that hyperdermal thickness was significantly increased in Tsk<sup>+/+</sup> mice compared to control littermates. BMMSC, but not *TERT*<sup>-/-</sup> MSCT improved hyperdermal thickness in Tsk<sup>+/+</sup> mice. *TERT*<sup>-/-</sup>-Asp, along with Asp group, also failed to reduce hyperdermal thickness in Tsk<sup>+/+</sup> mice. D: Dermal, M: Muscle, and HD: Hyperdermal. Error bars represent the s.d. of the mean values (n=6 in each group, \*\*\*p<0.005, \*\*p<0.01, \*p<0.05).
