# Supplementary material for: Telomerase governs immunomodulatory properties of mesenchymal stem cells by regulating FAS ligand expression
Source: PubMed Central journal article supplement (PMC3958307; doi:10.1002/emmm.201303000), 2014-01-13
Supplement: emmm0006-0322-sd11.pdf [file emmm0006-0322-sd11.pdf]

# Telomerase Governs Immunomodulatory Properties of Mesenchymal Stem Cells by Regulating Fas Ligand Expression

Chider Chen<sup>1,†</sup>, Kentaro Akiyama<sup>2,†</sup>, Takayoshi Yamaza<sup>3</sup>, Yong-Ouk You<sup>1</sup>, Xingtian Xu<sup>1</sup>, Bei Li<sup>4</sup>, Stan Gronthos<sup>5</sup>, Yan Jin<sup>4</sup>, Yimin Zhao<sup>4\*</sup>, and Songtao Shi<sup>1\*</sup>

## Supporting information

### Table of Content

**Figure S1** Characterization of BMMSCs from *TERT*<sup>-/-</sup> mice.

**Figure S2** BMMSCs from 6-month-old mice have reduced immunomodulatory property.

**Figure S3** FASL but not immunomodulatory factors mediates immunomodulation of BMMSCs.

**Figure S4** FASL is required for BMMSCs to induce T cell apoptosis *in vitro*.

**Figure S5** Aspirin pretreatment increased immunomodulation of BMMSCs through TERT activation.

**Figure S6** Aspirin treatment failed to ameliorate systemic sclerosis phenotypes.

**Figure S7** Western blot quantitative analyses.
